# Supplementary material
Source: publisher figshare collection journal article supplement (https://acs.figshare.com/ndownloader/files/18145802)
Supplement: Supplementary file 1 [file 18145802]

## Supporting Information

# Palladium Nanoparticles Immobilized on Nitride Carbon-Coated Mesoporous Tungsten Oxide for Formic Acid Dehydrogenation

*Shengyu Du,<sup>a</sup> Chenjun Zhang,<sup>a</sup> Pingping Jiang,<sup>a</sup> Yan Leng<sup>\*,a</sup>*

<sup>a</sup> The Key Laboratory of Synthetic and Biological Colloids, Ministry of Education, School of Chemical and Material Engineering, Jiangnan University, Wuxi, Jiangsu 214122, China. E-mail: [yanleng@jiangnan.edu.cn](mailto:yanleng@jiangnan.edu.cn)

### Materials

Palladium chloride (PdCl<sub>2</sub>, 99.9%, Alfa Aesar), Dicyandiamide (C<sub>2</sub>H<sub>4</sub>N<sub>4</sub>, 99%, Shanghai Chemical Reagent), Formic acid (FA, HCOOH, 98%, Shanghai Chemical Reagent), Sodium formate (SF, HCOONa, 99.99%, Aladdin), Tungsten chloride (WCl<sub>6</sub>, 99%, Aladdin), Sodium borohydride (NaBH<sub>4</sub>, Shanghai Chemical Reagent), Triblock copolymer (Pluronic F127, EO<sub>106</sub>-PO<sub>70</sub>-EO<sub>106</sub>, EO: ethylene oxide, PO: propylene oxide, Mw=12600, Sigma). All chemicals were commercially available and used directly.

### Preparation of nonporous WO<sub>3</sub> and NC-coated nonporous WO<sub>3</sub>

Seven mL of 65% nitric acid was diluted in deionized water (30 mL) with stirring for 10 min. NaWO<sub>4</sub>·2H<sub>2</sub>O (2 g, 6.1 mmol) was dissolved in 30 mL of deionized water with ultrasonic treatment for 5 min and slowly added to the nitric acid solution, which finally gave rise to a

light yellow precipitate. After stirring for another 30 min, the suspension was hydrothermally treated at 180 °C for 3 h. After cooling to room temperature, yellow product was centrifuged, washed with deionized water for 4 times and dried in vacuum for 12 h to yield about 1.2 g of the nonporous WO<sub>3</sub>.

Dicyandiamide (DCA) (3 g, 35.7 mmol) was dissolved in hot deionized water and WO<sub>3</sub> (1 g, 4.3 mmol) was added into it with vigorous stirring at 70 °C for 12 h. On completion, water was removed by rotary evaporation and the solid was dried in vacuum condition (60 °C) for 12 h to give a mixture product (DCA-WO<sub>3</sub>). 1.5 g of the hybrid was placed in an alumina boat in a quartz tube furnace and heated under argon at 400 °C for 2 h at a heating rate of 2 °C/min. After the system cooled down naturally, 0.89 g of NC<sub>400</sub>@nonporous-WO<sub>3</sub> was obtained.

## **Characterization**

The nitrogen sorption isotherms and pore size distribution curves were measured at the liquid nitrogen temperature (77 K) using a BELSORP-MINI analyzer. The morphology and the elemental distribution were studied by a field emission scanning electron microscope (FESEM; Hitachi S-4800, accelerated voltage: 5 kV) accompanied by Energy dispersive X-ray spectrometry (EDS; accelerated voltage: 20 kV). Scanning electron microscopy (SEM) images were performed on a SUPERSKAN SSX-550 electron microscope. Transmission electron microscopy (TEM) images were recorded with a JEOL JEM-2100 electron microscope operated at 200 kV. XRD patterns were collected on the Bruker D8 Advance powder diffractometer using Ni-filtered Cu/K $\alpha$  radiation source at 40 kV and 20 mA, from 5 ° to 90 ° with a scan rate of 2 °/min. Raman analysis was performed on a PerkinElmer-Raman Station

400F spectrometer equipped with a liquid N<sub>2</sub> cooled charge-coupled device detector and a confocal microscope. A 350 mW near-infrared 785 nm laser was used for analysis under ambient conditions. TGA was performed on a STA409 instrument in N<sub>2</sub> at a heating rate of 10 °C/min. Inductively coupled plasma atomic emission spectroscopy (ICP-AES) analysis for Pd loading amount was determined by a Jarrell-Ash 1100 ICP-AES spectrometer. FT-IR spectra were carried out with a Nicolet 360 FT-IR instrument (KBr discs) in the 4000-400 cm<sup>-1</sup> region. X-ray photoelectron spectroscopy (XPS) was conducted on a PHI 5000 Versa Probe Xray photoelectron spectrometer equipped with Al-Kα radiation (1486.6 eV).

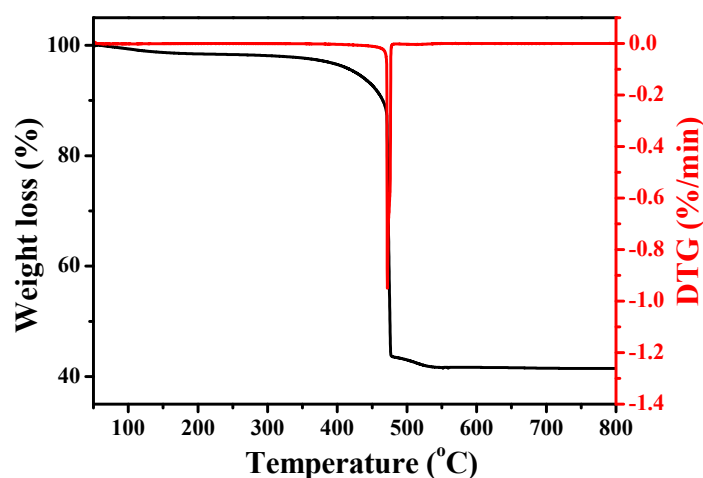

**Figure S1.** TGA for Pd/ NC<sub>400</sub>@WO<sub>3</sub> in O<sub>2</sub>.

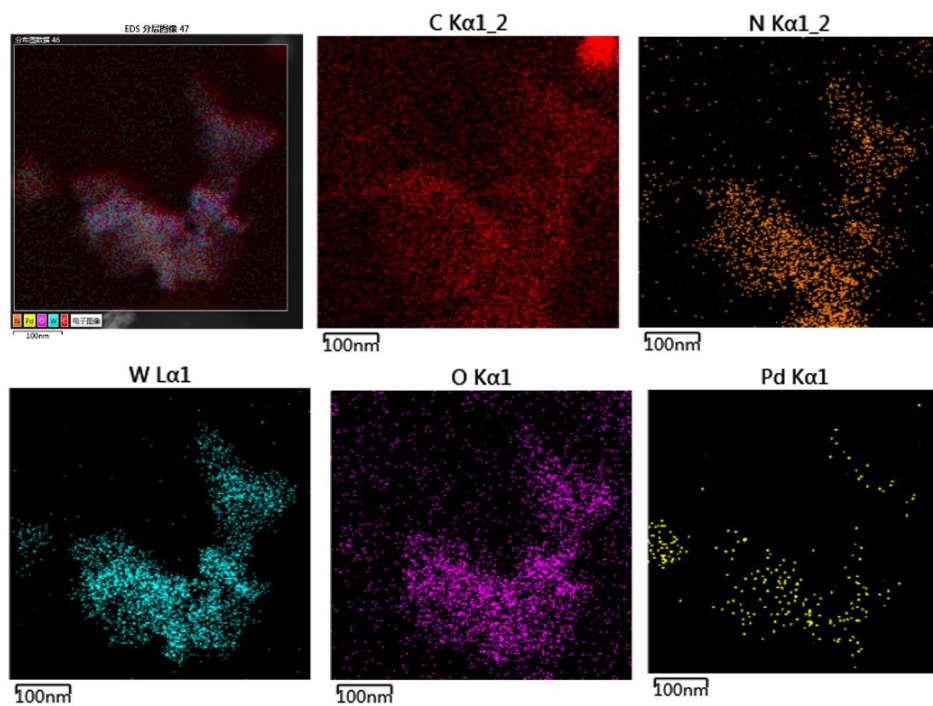

**Figure S2.** EDS mapping images of C, N, W, O, and Pd elements for Pd/NC<sub>400</sub>@WO<sub>3</sub>.

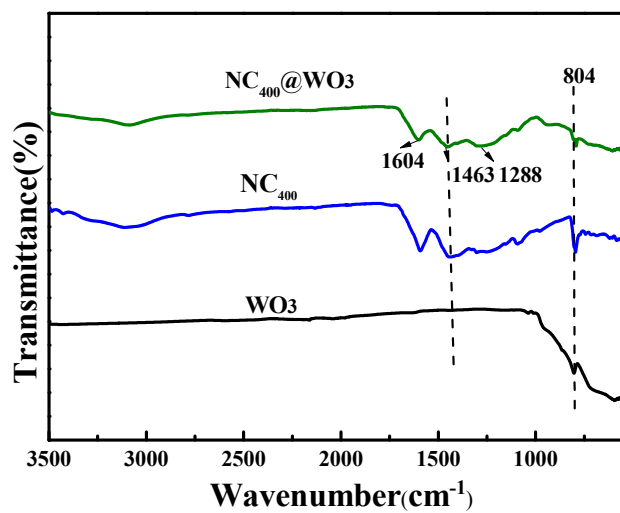

**Figure S3.** FT-IR spectra of WO<sub>3</sub>, NC<sub>400</sub> and NC<sub>400</sub>@WO<sub>3</sub>.

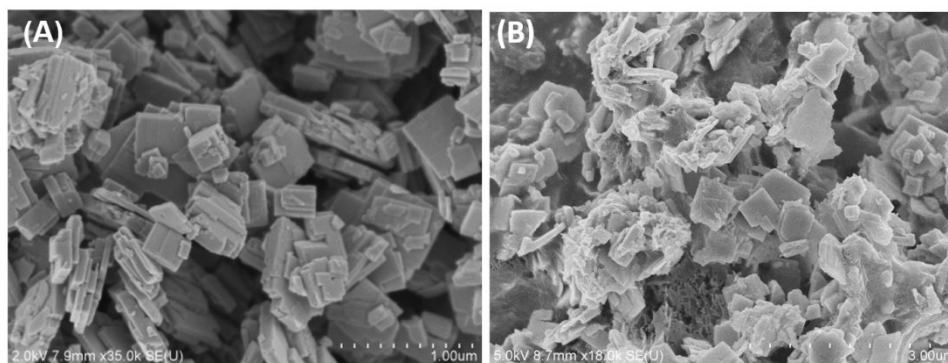

**Figure S4.** SEM images of (A) nonporous  $\text{WO}_3$  and (B)  $\text{NC}_{400}@\text{nonporous-WO}_3$ .

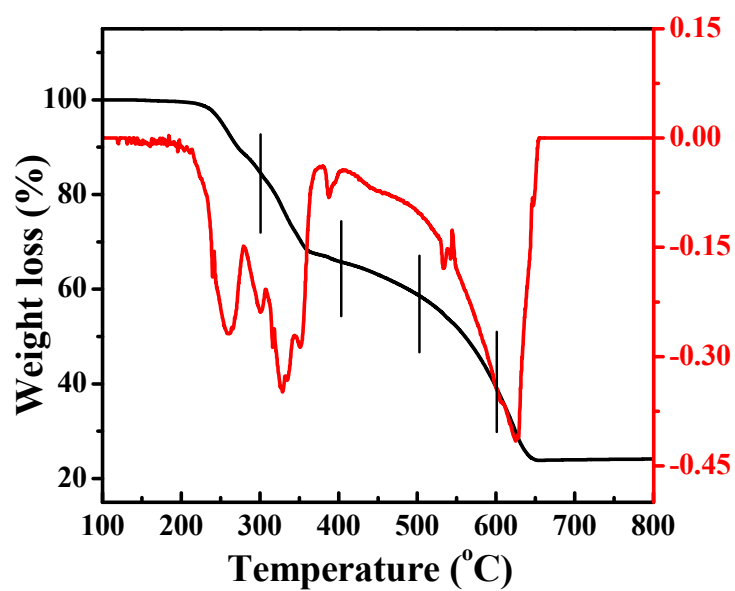

**Figure S5.** TGA for  $\text{DCA-WO}_3$

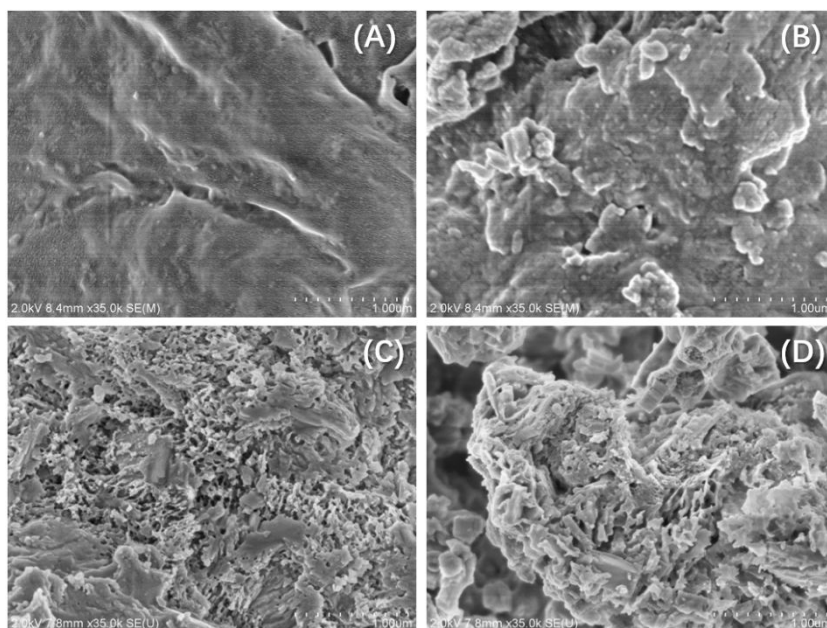

**Figure S6.** SEM images of (A) Pd/NC<sub>300</sub>@WO<sub>3</sub>, (B) Pd/NC<sub>400</sub>@WO<sub>3</sub>, (C) Pd/NC<sub>500</sub>@WO<sub>3</sub> and (D) Pd/NC<sub>600</sub>@WO<sub>3</sub>

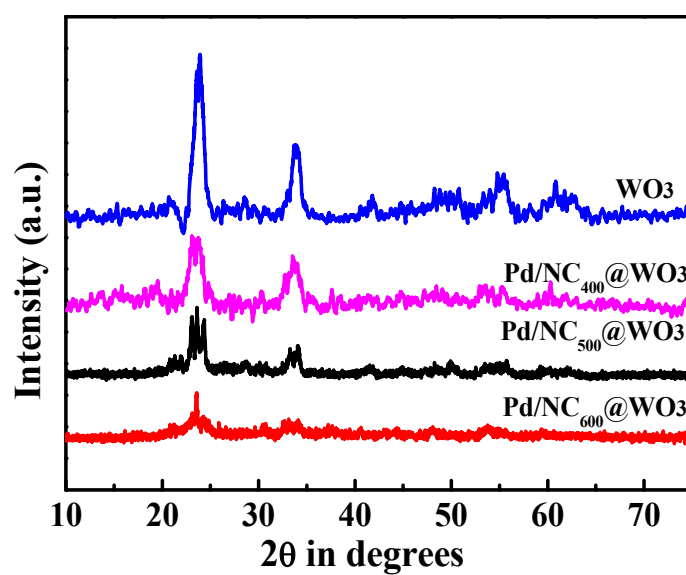

**Figure S7.** XRD patterns of WO<sub>3</sub>, Pd/NC<sub>400</sub>@WO<sub>3</sub>, Pd/NC<sub>500</sub>@WO<sub>3</sub> and Pd/NC<sub>600</sub>@WO<sub>3</sub>.

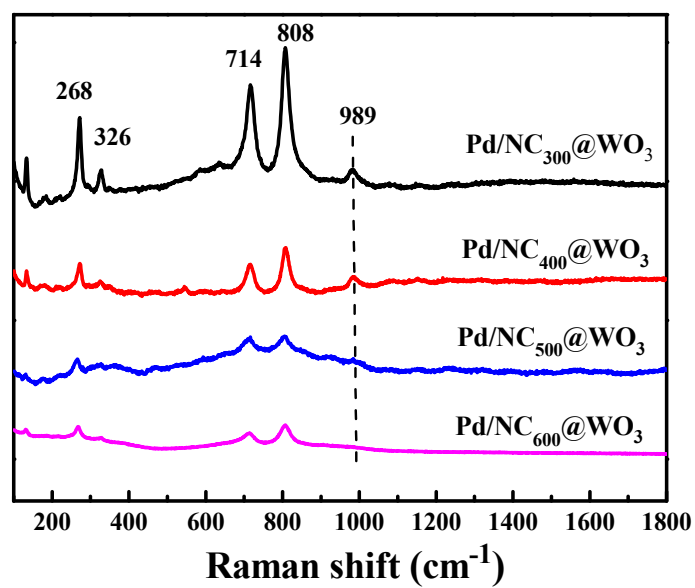

**Figure S8.** Raman patterns of Pd/NC<sub>300</sub>@WO<sub>3</sub>, Pd/NC<sub>400</sub>@WO<sub>3</sub>, Pd/NC<sub>500</sub>@WO<sub>3</sub> and Pd/NC<sub>600</sub>@WO<sub>3</sub>.

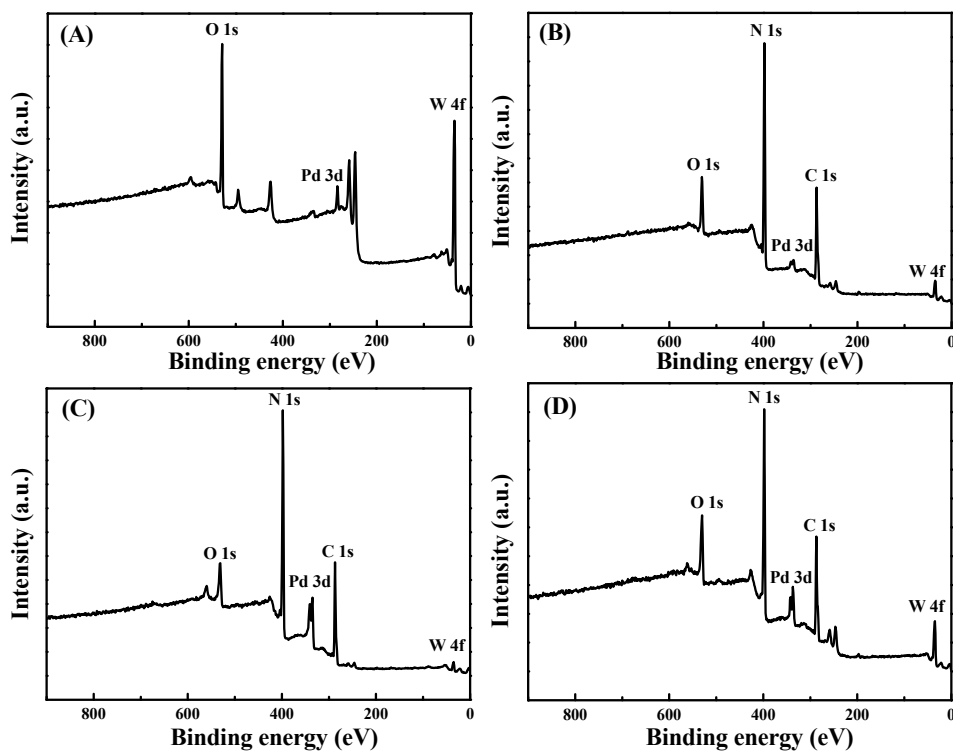

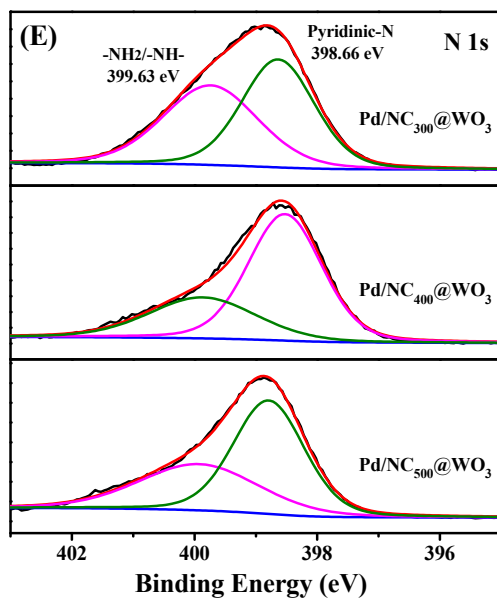

**Figure S9.** XPS spectra of (A) Pd/NC<sub>300</sub>@WO<sub>3</sub>, (B) Pd/NC<sub>400</sub>@WO<sub>3</sub>, (C) Pd/NC<sub>500</sub>@WO<sub>3</sub> and (D) Pd/NC<sub>600</sub>@WO<sub>3</sub>; and (E) high resolution XPS spectra.

**Table S1.** the XPS signal positions and assignments for Pd 3d, W 4f, and O 1s in Pd/NC<sub>n</sub>@WO<sub>3</sub>

| Sample                                | Pd <sup>0</sup> ( eV) |                   | Pd <sup>2+</sup> ( eV) |                   | Pd <sup>0</sup> /Pd <sup>2+</sup> Area ratio | W <sup>5+</sup>   |                   | W <sup>6+</sup>   |                   | W <sup>5+</sup> /W <sup>6+</sup> Area ratio | C-O               | Oxygen deficiency | Lattice oxygen    | Pyridinic N       |
|---------------------------------------|-----------------------|-------------------|------------------------|-------------------|----------------------------------------------|-------------------|-------------------|-------------------|-------------------|---------------------------------------------|-------------------|-------------------|-------------------|-------------------|
|                                       | 3d <sub>3/2</sub>     | 3d <sub>5/2</sub> | 3d <sub>3/2</sub>      | 3d <sub>5/2</sub> |                                              | 4f <sub>5/2</sub> | 4f <sub>7/2</sub> | 4f <sub>5/2</sub> | 4f <sub>7/2</sub> |                                             |                   |                   |                   |                   |
| Pd/WO <sub>3</sub>                    | 340.66                | 335.43            | 343.23                 | 337.83            | 1.26                                         | -                 | -                 | 37.71             | 35.58             | -                                           | -                 | 532.18<br>(24.1%) | 530.41<br>(75.9%) | -                 |
| Pd/NC <sub>300</sub> @WO <sub>3</sub> | 341.34                | 335.85            | 343.52                 | 336.83            | 1.15                                         | 36.83             | 35.02             | 37.72             | 35.57             | 0.43                                        | 533.41<br>(17.9%) | 532.08<br>(50.9%) | 530.65<br>(31.2%) | 398.66<br>(51.1%) |
| Pd/NC <sub>400</sub> @WO <sub>3</sub> | 340.85                | 335.69            | 342.96                 | 337.38            | 1.90                                         | 37.38             | 35.21             | 38.04             | 35.82             | 0.52                                        | 535.88<br>(35.9%) | 532.74<br>(39.0%) | 530.97<br>(25.1%) | 398.40<br>(68.8%) |
| Pd/NC <sub>500</sub> @WO <sub>3</sub> | 341.89                | 336.77            | 343.61                 | 336.23            | 0.99                                         | 36.23             | 35.09             | 37.87             | 35.69             | 0.57                                        | 542.92<br>(21.5%) | 532.74<br>(38.4%) | 530.51<br>(26.1%) | 398.80<br>(59.3%) |



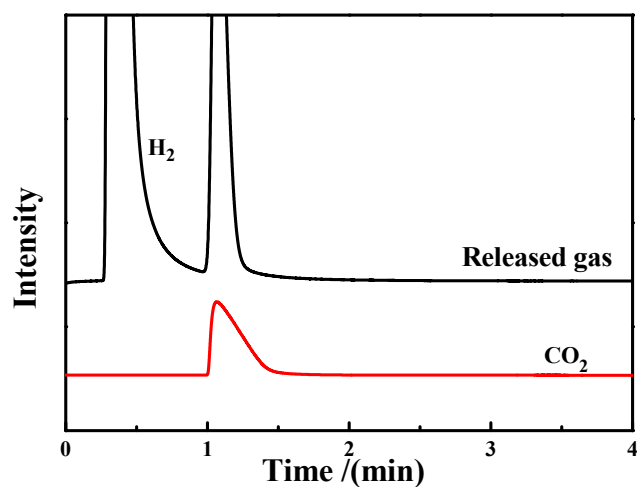

**Figure S10.** Gas chromatograms of the release gas from the decomposition of FA in a FA-SF system over Pd/NC<sub>400</sub>@WO<sub>3</sub>.

**Table S2.** Comparison of activities of different catalysts for hydrogen generation of FA

| Entry | Catalyst                                                    | T (K) | n <sub>FA</sub> /n <sub>metal</sub> | TOF(h <sup>-1</sup> ) | Ref. |
|-------|-------------------------------------------------------------|-------|-------------------------------------|-----------------------|------|
| 1     | Co <sub>0.30</sub> Au <sub>0.35</sub> Pd <sub>0.35</sub> /C | 298   | 50                                  | 80                    | S1   |
| 2     | Pd/mpg-C <sub>3</sub> N <sub>4</sub>                        | 298   | 225                                 | 114                   | S2   |
| 3     | Ag <sub>18</sub> Pd <sub>82</sub> @ZIF-8                    | 353   | 32                                  | 580                   | S3   |
| 4     | Ag <sub>1</sub> Pd <sub>4</sub> @NH <sub>2</sub> -UiO-66    | 353   | 100                                 | 893                   | S4   |
| 5     | Pd/CN <sub>0.25</sub>                                       | 298   | 133                                 | 752                   | S5   |
| 6     | Au@SiO <sub>2</sub>                                         | 403   | -                                   | 958                   | S6   |
| 7     | Pd/C                                                        | 333   | 250                                 | 87                    | S7   |
| 8     | NiPd/NH <sub>2</sub> -N-rGO                                 | 298   | 50                                  | 954                   | S8   |
| 9     | 4-PySI-Pd@Cu(BDC)                                           | 293   | -                                   | 412                   | S9   |

## References

- S1. Wang, Z. L.; Yan, J. M.; Ping, Y.; Wang, H. L.; Zheng, W. T.; Jiang, Q. An Efficient CoAuPd/C Catalyst for Hydrogen Generation from Formic Acid at Room Temperature. *Angew. Chem., Int. Ed.* **2013**, *52*, 4406-4409.
- S2. Lee, J. H.; Ryu, J.; Kim, J. Y.; Nam, S. W.; Han, J. H.; Lim, T. H.; Gautam, S.; Chae, K. H.; Yoon, C. W. Carbon Dioxide Mediated, Reversible Chemical Hydrogen Storage Using a Pd Nanocatalyst Supported on Mesoporous Graphitic Carbon Nitride. *J. Mater. Chem. A*. **2014**, *2*, 9490-9495.
- S3. Dai, H. M.; Xia, B. Q.; Wen, L.; Du, C.; Su, J.; Luo, W.; Cheng, G. Z. Synergistic Catalysis of AgPd@ZIF-8 on Dehydrogenation of Formic Acid. *Appl. Catal. B. Environ.* **2015**, *165*, 57-62.
- S4. Gao, S. T.; Liu, W. H.; Feng, C.; Shang, N. C.; Wang, C. A Ag-Pd Alloy Supported on an Amine-Functionalized UIO-66 as an Efficient Synergetic Catalyst for the Dehydrogenation of Formic Acid at Room Temperature. *Catal. Sci. Technol.* **2016**, *6*, 869-874.
- S5. Bi, Q. Y.; Lin, J. D.; Liu, Y. M.; He, H. Y.; Huang, F. Q.; Cao, Y. Dehydrogenation of Formic Acid at Room Temperature: Boosting Palladium Nanoparticle Efficiency by Coupling with Pyridinic-Nitrogen-Doped Carbon. *Angew. Chem., Int. Ed.* **2016**, *55*, 11849-11853.
- S6. Mielby, J.; Kunov-Kruse, A. J.; Kegnæs, S. Decomposition of Formic Acid over Silica Encapsulated and Amine Functionalised Gold Nanoparticles. *J. Catal.* **2017**, *345*, 149-156.

- S7. Jeon, H. J.; Chung, Y. M. Hydrogen Production from Formic Acid Dehydrogenation over Pd/C Catalysts: Effect of Metal and Support Properties on the Catalytic Performance. *Appl. Catal. B: Environ.* **2017**, *210*, 212-222.
- S8. Yan, J. M.; Li, S. J.; Yi, S. S.; Wulan, B. R.; Zheng, W. T.; Jiang, Q. Anchoring and Upgrading Ultrafine NiPd on Room-Temperature-Synthesized Bifunctional NH<sub>2</sub>-N-RGO toward Low-Cost and Highly Efficient Catalysts for Selective Formic Acid Dehydrogenation. *Adv. Mater.* **2018**, *30*, 1703038.
- S9. Alamgholiloo, H.; Zhang, S. B.; Ahadi, A.; Rostamnia, S.; Banaei, R.; Li, Z. C.; Liu, X.; Shokouhimehr, M. Synthesis of Bimetallic 4-Pysi-Pd@Cu(BDC) via Open Metal Site Cu-MOF: Effect of Metal and Support of Pd@Cu-MOFs in H<sub>2</sub> Generation from Formic Acid. *Molecular Catalysis* **2019**, *467*, 30-37.
